# Supplementary material for: Streptococcus salivarius Probiotics to Prevent Acute Otitis Media in Children: A Randomized Clinical Trial
Source: PubMed Central journal article supplement (PMC10623191; doi:10.1001/jamanetworkopen.2023.40608), 2023-11-02
Supplement: jamanetwopen-e2340608-s001.pdf [file jamanetwopen-e2340608-s001.pdf]

1  
2  
3  
4  
5  
6  
7  
8  
9  
10  
11  
12  
13  
14  
15  
16  
17  
18  
19  
20  
21  
22  
23

**Effect of *Streptococcus salivarius* K12 Oral Probiotic Products on Prevention of Acute Otitis Media in Children: A Randomized Clinical Trial**

ORIGINAL RESEARCH PROTOCOL AND STATISTICAL ANALYSIS PLAN

Suvi Sarlin, M.D.<sup>1,2</sup>, Ulla Koskela, M.D., Ph.D.<sup>1,2,3</sup>, Minna Honkila, M.D., Ph.D.<sup>1,2</sup>, Paula Tähtinen, M.D., Ph.D.<sup>4</sup> Tytti Pokka, M.Sc.<sup>1,2,5</sup>, Marjo Renko, M.D., Ph.D.<sup>6</sup>, Terhi Tapiainen, M.D., Ph.D.<sup>1,2,7</sup>

1. Department of Pediatrics and Adolescent Medicine, Oulu University Hospital, Oulu, Finland
2. Research Unit of Clinical Medicine and Medical Research Center Oulu, University of Oulu, Oulu, Finland
3. Department of Anesthesiology, Oulu University Hospital, Finland
4. Department of Pediatrics, University of Turku, Turku, Finland
5. Research Service Unit, Oulu University Hospital, Finland
6. University of Eastern Finland and Kuopio University Hospital, Kuopio, Finland
7. Biocenter Oulu, University of Oulu, Oulu, Finland

**#Address correspondence to:** Terhi Tapiainen, Department of Pediatrics and Adolescent Medicine, Oulu University Hospital, P.O. Box 23, FIN 90029 Oulu, Finland, [suvi.sarlin@oulu.fi], telephone: +358-8-3158426, fax: +358-8-3155559  
Alternative correspondent: Suvi Sarlin, Department of Pediatrics and Adolescent Medicine, Oulu University Hospital, P.O. Box 23, FIN 90029 Oulu, Finland, [terhi.tapiainen@oulu.fi], telephone: +358-8-3155185, fax: +358-8-31555

24

25 **ROLES**

26 *Concept and design:* Koskela, Sarlin, Tähtinen, Renko, Tapiainen.

27 *Acquisition, analysis, or interpretation of data:* All authors.

28 *Drafting of the manuscript:* Koskela, Sarlin, Honkila, Tapiainen.

29 *Critical revision of the manuscript for important intellectual content:* All authors.

30 *Statistical analysis:* Sarlin, Honkila, Pokka, Tapiainen.

31 *Funding obtained:* Sarlin, Tapiainen.

32 *Supervision:* Honkila, Tähtinen, Renko, Tapiainen.

33

34 **ABBREVIATIONS**

35 AOM acute otitis media

36 CFUs colony-forming units

37 CI confidence interval

38 MEE middle ear effusion

39 PCV7 7-valent pneumococcal conjugate vaccine with 7 pneumococcal serotypes included

40 PCV10 10-valent pneumococcal *Haemophilus influenzae* protein D conjugate vaccine with 10  
41 pneumococcal serotypes included

42 RR risk ratio

43

## 1. BACKGROUND, RATIONALE, AND HYPOTHESIS

### *Background*

Acute otitis media (AOM) is the most common reason for antibiotic use for young children.<sup>1</sup> The common bacterial otopathogens *Streptococcus pneumoniae*, *Haemophilus influenzae*, and *Moraxella catarrhalis* are found in the nasopharynx from early infancy.<sup>2,3</sup> A viral respiratory tract infection enhances changes in the nasopharyngeal environment, resulting in the increased adhesion and growth of otopathogens and their rise via Eustachian tube from the oral cavity and nasopharynx to the middle ear.<sup>4-6</sup> Current options for primary prevention of AOM are limited. The pneumococcal conjugate vaccine (PCV) only modestly decreases the incidence of AOM, with estimates ranging from 8% to 10% for PCV7<sup>7,8</sup> and from no effect to 23% for PCV10.<sup>9,10</sup> Influenza vaccination reduces the occurrence of AOM during the influenza epidemic season.<sup>11,12</sup> Xylitol products are effective in preventing AOM only if administered regularly after every meal.<sup>13-16</sup> Thus, novel options for the primary prevention of AOM are needed.

### *Rationale*

Probiotics containing *Lactobacillus rhamnosus* GG may be effective in preventing symptomatic viral respiratory infections.<sup>17,18</sup> Lactobacilli do not, however, belong to the nasopharyngeal core microbiome.<sup>19</sup> Accordingly, probiotic lactobacilli have proven ineffective in AOM prevention,<sup>20</sup> even when *L. rhamnosus* GG nasopharyngeal colonization has been achieved.<sup>21</sup> In contrast to lactobacilli, alpha-hemolytic streptococci belong to the normal core microbiome of the nasopharynx.<sup>22-24</sup> In an earlier study in Sweden, an in-house alpha-streptococcal mixture spray after the antimicrobial treatment of AOM successfully reduced the recurrence of AOM.<sup>25</sup> The in-house bacterial sprays have not been evaluated for their safety and may vary in their efficacy. Thus, they are not suitable for large interventions.

Commercially available probiotic products containing *Streptococcus salivarius* strains K12, M18, or 24smb have recently been developed for oral health care.<sup>26-29</sup> *S. salivarius* K12 was originally isolated from the oral cavity of a healthy schoolboy in New Zealand.<sup>29</sup> *S. salivarius* K12 uses bacteria–bacteria and host–bacteria contacts and indirect methods to defend its habitat.<sup>30</sup> *S. salivarius* K12 produces bacteriocin-like inhibitory substances, including salivaricins. *S. salivarius* K12 oral probiotic products have been shown to successfully colonize the human oral cavity and pharynx<sup>31,32</sup> and to produce the lantibiotic salivaricin.<sup>33</sup> Previous clinical studies using *S. salivarius*

74 K12 products mainly focused on streptococcal pharyngotonsillitis, with some favorable results.<sup>34-37</sup>  
75 Earlier, we showed that oral *S. salivarius* K12 products (oral soluble powder or chewable tablets)  
76 reduced the relative abundance of otopathogens in the nasopharyngeal microbiome in a randomized  
77 trial (Sarlin S. submitted manuscript, EudraCT 2017-000820-83). The diversity of the  
78 nasopharyngeal microbiome remained unchanged. Families and children found both products  
79 feasible to use.

80 In this randomized, placebo-controlled trial, we will investigate the clinical efficacy of *S. salivarius*  
81 K12 probiotic products in preventing AOM in children.

82

## 83 **2. METHODS**

### 84 ***Study design and study population***

85 This study is designed as a pragmatic, placebo-controlled, double-blind, randomized (parallel  
86 allocation ratio 1:1) clinical trial in young children attending day care centers in the City of Oulu,  
87 Finland. The children will be randomly allocated to receive either an oral *S. salivarius* K12 product  
88 or placebo. Young children (< 3 years of age) will use oral powder, and older children (> 3 years of  
89 age) will use chewing tablets. The products have been used in a randomized clinical trial showing  
90 the microbiological effect in the nasopharyngeal microbiome (Sarlin S. submitted manuscript,  
91 EudraCT 2017-000820-83).

### 92 ***Recruitment***

93 Participation will be offered to all children attending day care centers in Oulu in August–November  
94 2020. Intervention and clinical follow-up will last 6 months from study entry. Day-care children  
95 have an increased risk of AOM.<sup>13</sup> Our aim is to recruit children when they have started day care  
96 after the summer holiday and before they acquire their first viral respiratory infection.

97 Only children whose families have given their written informed consent will be enrolled. To inform  
98 parents, study physicians will visit the evening sessions of day-care centers and give presentations  
99 about the rationale of the study, at which parents will be allowed to ask questions. Study physicians  
100 will visit day-care centers and examine the ear status of the children before recruiting.

101 **Addition 8.9.2020.** Due to the COVID-19 pandemic and restrictions in the day-care centers, the ear  
102 status of children will not be examined. Local child health clinics will share study information

103 pamphlets for the parents. AOM infections during the last 6 months will be inquired about on the  
104 electronic background data sheet. Informed consent forms will be gathered from day-care centers or  
105 via mail. Study physicians will deliver the study products either to day-care centers or personally.  
106 Parents can contact the study physicians any time via email, call, or text messages or in weekly  
107 open Zoom meetings.

108 **Addition 30.10.2020.** Due to small attendance, we expanded the recruitment area to municipal or  
109 local private day-care centers Muhos, Liminka, and Muhos and Kempele in the Oulu region, Finland.

110 ***Inclusion criteria***

- 111 • Age 12 months–7 years
- 112 • Day care attendance or a younger sibling of study participant who is not yet attending day  
113 care
- 114 • Written informed consent from a parent
- 115 • Able to use oral study products

116 ***Exclusion criteria***

- 117 • Middle ear effusion (MEE) at study entry (assessed by tympanometry and/or otoscopy by  
118 study physician)
- 119 • Ongoing continuous antimicrobial prophylaxis
- 120 • Immunosuppression or primary immunodeficiency, including Down’s syndrome
- 121 • The use of other probiotic products is discouraged but is not used as an exclusion criterion

122 **Addition 8.9.2020.** Due to the COVID-19 pandemic and restrictions in day-care centers, the ear status of  
123 children will not be examined. Thus, MEE has been removed from the exclusion criteria.

124

125 ***Interventions***

126 Children will receive an oral probiotic product **every evening for 6 months**. One daily dose is one sachet of  
127 **oral soluble powder** for young children (< 3 y) and **one chewable tablet** for older children (≥ 3 y). *S.*  
128 *salivarius* chewable tablets are available in Finland as a commercial over-the-counter probiotic  
129 product (ToothGuide®, GutGuide Ltd., Finland). A daily dose contains **1 × 10<sup>9</sup> colony-forming**  
130 **units (CFUs) of *S. salivarius* K12**, a quantity that has previously been successful in the  
131 colonization of the nasopharynx in adults.<sup>36</sup>

132 ***Products for children < 3 years of age***

- 133 • One sachet of soluble oral powder in the treatment arm contains 1 x 10<sup>9</sup> CFUs of *S.*  
134 *salivarius* K12 per sachet with 1010 mg of maltodextrin (bulking agent), fructo-  
135 oligosaccharide (bulking agent), and strawberry flavors (10 mg).
- 136 • One sachet of soluble oral powder in the placebo arm looks and tastes similar to the  
137 treatment product. The placebo contains 1010 mg of maltodextrin (bulking agent), FOS  
138 (bulking agent), and strawberry flavors (10 mg) without *S. salivarius* K12.

139 **Addition 30.10.20**

- 140 • Sachets are also suitable for children > 3 years of age.

141

142 ***Products for children ≥ 3 years of age***

- 143 • One oral chewable table in the treatment arm contains 1 x 10<sup>9</sup> CFUs of *S. salivarius* K12  
144 with isomaltitol (789 mg), xylitol (72.2 mg), peppermint flavor (10 mg), silicon dioxide (6.9  
145 mg), D3 vitamin (10 µg), *Lactobacillus rhamnosus* GG (1 x 10<sup>8</sup> CFUs), and  
146 *Propionibacterium shermanii* (1 x 10<sup>8</sup> CFUs).
- 147 • The chewable tablets in the placebo arm look and taste similar. The placebo chewable tablet  
148 contains all the same ingredients, including D3 vitamin, but without *S. salivarius* K12,  
149 *Lactobacillus rhamnosus* GG, and *Propionibacterium shermanii* (1 x 10<sup>8</sup> CFUs).

150 ***Randomization***

151 The randomization lists and sheets will be created by a biostatistician—who will not participate in  
152 the recruitment or clinical follow-up—with **computerized block randomization using permuted**  
153 **blocks of variable size**. Randomization with a 1:1 allocation ratio will be stratified according to

154 age (children < 3 years and ≥ 3 years). The individual randomization sheets will be inserted into  
155 opaque envelopes with ascending numbers on the cover. The study physician will open each sealed  
156 randomization envelope after the parent has signed the written informed consent and the ears have  
157 been examined to rule out MEE at study entry.

158 ***Primary outcome***

- 159 • The proportion of children with at least one AOM episode requiring antimicrobial treatment  
160 in 0–6 months

161

162 ***Secondary outcomes***

- 163 • The proportion of children with a recurring AOM episode requiring antimicrobial treatment  
164 in 0–6 months (i.e., at least 3 AOM episodes in 0–6 months)
- 165 • Time to the first AOM episode requiring antimicrobial treatment during the intervention  
166 until 6 months
- 167 • The incidence density of all AOM episodes diagnosed by physician (episodes of AOM per  
168 PYR, person years at risk) in 0–6 months
- 169 • The proportion of children with any antimicrobial treatment in 0–6 months
- 170 • The proportion of children with any physician appointments due to acute illness in 0–6  
171 months
- 172 • The number of new acute respiratory infections in 0-6 months
- 173 • Number of days of parental absenteeism from work due to a child’s illness in 0–6 months

174 **Addition 28.5.2020**

- 175 • The proportion of children with hospitalization due to acute respiratory illness in 0–6  
176 months and duration of hospitalization

177

178 **Addition 30.10.2020** Due to the COVID-19 pandemic, large-scale respiratory sampling from all  
179 children with any respiratory symptoms has been recommended in Finland from August 2020  
180 onward. For these reasons, we added the following outcome variables to the research protocol:

- 181 • Proportion of children with a respiratory viral sample (i.e., respiratory symptoms in 0–6  
182 months)
- 183 • Proportion of children with COVID-19 infection or positive SARS-CoV-2 sample in 0–6

184  
185  
186  
187  
188  
189  
190  
191  
192  
193  
194  
195  
196  
197  
198  
199  
200  
201  
202  
203  
204  
205  
206  
207  
208  
209  
210  
211  
212  
213  
214

months

- Proportion of children with throat swab
- Proportion of children with *Streptococcus pyogenes* infection or positive StrepA culture in 0–6 months
- Proportion of children with other bacterial findings or viral findings in 0–6 months

**Addition 17.12.21** We added following outcomes to the research protocol:

- Proportion of children with at least one respiratory tract infection episode in 0–6 months
- Proportion of children who have undergone COVID-19 testing in 0–6 months
- The number of any AOM episodes per child (including parent-reported AOM episodes without antibiotic prescriptions) in 0–6 months
- Proportion of children with  $\geq 1$  acute respiratory tract infection episode in 0–6 months
- Number of acute respiratory tract symptom days per child in 0–6 months
- The proportion of children with hospitalization due to acute respiratory illness in 0–6 months and duration of hospitalization for any acute reason
- Proportion of children with  $\geq 1$  parent who has reported wheezing episodes in 0–6 months
- Incidence of acute AOM episodes measured as verified and purchased antibiotic prescriptions in 0–6 months
- Incidence of acute AOM episodes measured as parent reported episodes or AOM episodes that passed with watchful waiting and verified antibiotic prescriptions in 0–6 months

We report the numbers of the following samples without comparing them between groups, thus removing them from secondary outcomes:

- Proportion of children with a respiratory viral sample (i.e. respiratory symptoms in 0–6 months)
- Proportion of children with a throat swab
- Proportion of children with *Streptococcus pyogenes* infection or positive StrepA culture in 0–6 months
- Proportion of children with other bacterial findings or viral findings in 0–6 months

215 ***Sample size calculation***

216 We will compare the clinical efficacy of *S. salivarius* K12-containing products in preventing AOM  
217 in day-care children with that of placebo products. The primary outcome is the proportion of  
218 children with at least AOM episode during the study.

219 The **baseline** for the proportion of day-care children with at least one AOM episode is predicted to  
220 be **30%** during the 6-month trial (Sep–Feb). The estimate is based on the earlier publications  
221 before and after the pneumococcal conjugate vaccine was implemented in the national vaccination  
222 program in Finland in 2010. In 2006, altogether, 20% of Finnish day-care children (1–6 y of age) in  
223 the city of Oulu experienced at least one AOM episode in 3 months.<sup>16</sup> In another cohort of young  
224 Finnish children, approximately 800 AOM episodes occurred in 1000 children in 6 months during  
225 the epidemic season (September–February).<sup>38</sup> In the pneumococcal conjugate vaccine era, Finnish  
226 children with the pneumococcal vaccine had 1.0 AOM episode per one year, as compared with 1.3  
227 episodes per year in those unvaccinated.<sup>9</sup>

228 We regard the effect to be clinically significant if the occurrence of AOM decreases by 30% (i.e.,  
229 the proportion of children **with at least one AOM episode decreases from 30% to 21% in 6**  
230 **months**). With a statistical power of 80% and alpha error of 5%, **we will recruit 389 children per**  
231 **group (salivarius vs. placebo)**. To compensate for a possible 5% rate of dropouts and lacking  
232 clinical information, we will recruit at least 410 children per group. For children younger than 3  
233 years of age, we will use oral powder sachets (**38 000 treatment and 38 000 placebo sachets**  
234 **available**; products available for 211 children per group), and for older children, chewable tablets  
235 (**1800 x 30 chewable tablets for treatment and 1800 x 30 for the placebo group available**;  
236 products available for 300 children per group). Altogether, **we will recruit at least 820 children**  
237 but no more than 1000 children.

238

239 **Addition 30.10.2020:** *Due to the COVID-19 pandemic*, the occurrence of AOM is likely to  
240 decrease due to large-scale hygiene interventions in society. We assume that the proportion of  
241 children with at least one AOM will decrease from 30% to 12% (60% relative decrease). With this  
242 new baseline occurrence, we regard a 50% relative decrease as clinically significant (**12% to 6%**),  
243 with 80% power and 5% alpha error. The required novel sample size is 356 per group (uncorrected  
244 chi-square) and 389 per group (corrected chi-square), in total 778 children. As the primary outcome

245 will be available for all children from the comprehensive national registry, we assume a small  
246 dropout rate of 3%. Thus, we will recruit **at least 801** children.

247

248

249 ***Definitions, clinical follow-up, and data collection***

250 **AOM diagnosis is defined according to** the national Finnish Current Clinical Guideline for AOM  
251 as an acute, short-term, and clinically diagnosed episode of otitis media, with signs of tympanic  
252 membrane inflammation and the presence of MEE and at least one acute clinical symptom, such as  
253 rhinitis, cough, fever, throat ache, ear ache, impaired hearing, or increased crying.<sup>39</sup>

254 **Background characteristics** will be solicited through an electronic questionnaire at study entry.  
255 Background characteristics include the known risk factors for AOM: the duration of day care, the  
256 number of siblings, parental smoking, previous history of AOM and related operations, presence of  
257 ventilation tubes, the duration of breastfeeding, the previous or current use of a pacifier, previous  
258 vaccinations, current medications, previous and current use of probiotic products, and any  
259 antimicrobial treatment during the preceding 6 months before study entry.

260 **The primary outcome will be met** (i.e., AOM requiring antimicrobial treatment will be recorded)  
261 if a parent has purchased antimicrobial prescription on the comprehensive national prescription  
262 registry (Kanta.fi) by any primary care physician or hospital unit and the review of original medical  
263 records confirms that the indication for the antimicrobial treatment was AOM, defined according to  
264 the national guideline.

265 **For secondary outcomes**, recurring AOM episodes requiring antimicrobial treatment and the time  
266 to the first AOM episode requiring antimicrobial treatment will be defined and recorded in a  
267 similar manner as the primary outcome. Any AOM diagnosis, regardless of antimicrobial  
268 treatment, made by any physician, will be solicited through **monthly web-based questionnaires**  
269 administered to families and by review of medical records. Any antimicrobial treatment is defined  
270 as any course of antimicrobial treatment regardless of the prescription indication. The number of  
271 days with any antimicrobial treatment will be recorded from the comprehensive national  
272 prescription registry (Kanta.fi). Any physician appointments and novel and parental absenteeism  
273 from work due to their child's illness will be solicited through monthly web-based questionnaires.

274 **The compliance and the use of other probiotic products** during the study will be collected  
275 through monthly web-based questionnaires.

276

277

278  
279  
280  
281  
282  
283  
284  
285  
286  
287  
288  
289  
290  
291  
292  
293  
294  
295  
296  
297  
298  
299  
300  
301  
302  
303  
304  
305  
306  
307

***Time schedule***

- March–April 2020: ethical committee approval and Fimea (Finnish Medicines Agency) approval with EudraCT number and the research approval by the City of Oulu
- March–April 2020: web-based questionnaires and electronic symptom sheet diaries
- May 2020: trial registration on ClinicalTrials.gov
- August–October 2020: recruiting study physicians Dr. Ulla Koskela and Dr. Suvi Sarlin to visit 50 day care centers
- Intervention and follow-up 6 months from Aug–Oct 2020 to Feb–May 2021.
  - Monthly questionnaires and retrieval of electronic symptom sheet diary data by study nurse Leena Okkonen
  - Review of the medical records of all children with antimicrobial use during the study by Dr. Ulla Koskela and Dr. Suvi Sarlin

**Addition 30.9.2020.** An electronic AOM diagnostic helper with 8 ear status pictures, including purulent AOM, will be sent to parents. If AOM is diagnosed, the parents will present the pictures to the attending doctor. The doctor will add the number of pictures best representing the ear status to the patient records.

- The electronic diary will include 8 different pictures of healthy tympanum, bulging and infected tympanum, and tympanum with chronic otitis media effusion. If AOM is diagnosed, parents will present the pictures to the attending doctor, who will add the most presentative pictures to the patient records.

**Addition 30.10.2020.** Due to small attendance, we expanded the recruitment area to municipal or local private day-care centers Muhos, Liminka, and Muhos and Kempele in the Oulu region, Finland.

***Statistical analysis plan***

All analyses will be conducted on the intention-to-treat population (i.e., in all randomized patients regardless of their compliance with the study product). Only outcomes specified in the protocol before data analysis will be compared. We will compare the proportions of children who meet the primary outcome or secondary outcomes between groups by the standard normal deviate test and will present 95% confidence intervals (CIs) of the differences. In addition to absolute risk reduction, risk ratios with 95% CIs will be calculated. Time-to-event analysis will be performed

308 using the Kaplan-Meier estimator and tested by a log-rank test. The number of days with parental  
309 absenteeism will be compared using a t-test or Mann–Whitney U-test as applicable, and the 95%  
310 CIs of the differences will be reported. If there is a statistically significant difference in the primary  
311 outcome between the groups, subgroup analyses in children younger than 3 years and in children  
312 older than 3 years will be performed.

313

### 314 **3. IMPACT OF THE STUDY**

315 Preventing AOM would be the most convenient and efficient way to reduce problems related to  
316 AOM morbidity. The discomfort due to acute symptoms, parental absenteeism from work, and  
317 other direct and indirect costs of otitis media are important reasons to prevent AOM in children.  
318 AOM has a significant impact on public health as otitis media is the most common reason for  
319 antibiotic treatment in young children.<sup>40</sup> Nasopharyngeal pneumococcal carriage is common in  
320 children, and children are exposed to antibiotics repeatedly due to frequent otitis media episodes.  
321 Antibiotic consumption for common respiratory infections is related to the emerging antimicrobial  
322 resistance.<sup>41,42</sup> Furthermore, antimicrobial treatment in children has been reported to be associated  
323 with subsequent overweight, juvenile rheumatoid arthritis, inflammatory bowel disease, and  
324 asthma.<sup>43-46</sup> This has been suggested to be related to the reported changes in the gut microbiome  
325 after oral antimicrobial courses in children.<sup>47</sup> Recurrent otitis media is still the most common reason  
326 for surgery in children. In total, 700 000 annual myringotomies with insertions of ventilator tubes  
327 are performed in children in the United States.<sup>48</sup> Long-term sequelae of AOM have been suggested  
328 because MEE during AOM episode impairs hearing in children, corresponding to hearing levels  
329 ranging from 20 to 50 dB.<sup>49</sup> Even though antimicrobial treatment markedly reduces the duration of  
330 MEE and hearing impairment due to AOM,<sup>50</sup> children with a prolonged presence of MEE may  
331 suffer from reduced receptive and expressive language skills.<sup>51</sup>

### 332 **4. FUNDING**

333 This is an independent, investigator-driven clinical randomized trial. The study products are  
334 purchased via GutGuide Ltd., Finland. The accuracy of the product information in the study protocol  
335 was reviewed by the manufacturers before the study. The study is funded by Academy of Finland (to  
336 Terhi Tapiainen), Pediatric Research Foundation Finland (to Terhi Tapiainen), and University of

337 Oulu Graduate School (to Suvi Sarlin). Manufacturers of the products or funders of the study do not  
338 interfere with the study protocol, analyses, or writing of the manuscript.

### 339 **5. ETHICAL CONSIDERATIONS**

340 The study will be conducted according to good clinical practice (GCP) guidelines. All key  
341 personnel have completed their GCP training. Only children whose parents give their written  
342 informed consent will be recruited. The Ethical Committee of the Oulu University Hospital District  
343 will review the study protocol and informed consent forms before the study.

### 344 **6. TRIAL REGISTRATION**

345 The trial will be registered at [ClinicalTrials.gov](https://clinicaltrials.gov) and [ClinicalTrialsRegister.eu](https://clinicaltrialsregister.eu) before the study.

### 346 **7. FINNISH MEDICAL AGENCY**

347 The trial will be reported to FIMEA, the representative of the European Medicines Agency, before  
348 the study.

349

350 **References**

- 351 1. **Vaz LE, Kleinman KP, Raebel MA, et al.** Recent trends in outpatient antibiotic use in children.  
352 *Pediatrics*. 2014;**133**:375-385. doi: 10.1542/peds.2013-2903.
- 353 2. **Faden H, Duffy L, Wasielewski R, Wolf J, Krystofik D, Tung Y.** Relationship between  
354 nasopharyngeal colonization and the development of otitis media in children. Tonawanda/Williamsville  
355 *Pediatrics. J. Infect. Dis.* 1997;**175**:1440-1445.
- 356 3. **Kilpi T, Herva E, Kaijalainen T, Syrjanen R, Takala AK.** Bacteriology of acute otitis media in a  
357 cohort of Finnish children followed for the first two years of life. *Pediatr. Infect. Dis. J.* 2001;**20**:654-  
358 662.
- 359 4. **Faden H, Stanievich J, Brodsky L, Bernstein J, Ogra PL.** Changes in nasopharyngeal flora during  
360 otitis media of childhood. *Pediatr. Infect. Dis. J.* 1990;**9**:623-626.
- 361 5. **Revai K, Mamidi D, Chonmaitree T.** Association of nasopharyngeal bacterial colonization during  
362 upper respiratory tract infection and the development of acute otitis media. *Clin. Infect. Dis.*  
363 2008;**46**:e34-7. doi: 10.1086/525856.
- 364 6. **Chonmaitree T, Jennings K, Golovko G, et al.** Nasopharyngeal microbiota in infants and changes  
365 during viral upper respiratory tract infection and acute otitis media. *PLoS One*. 2017;**12**:e0180630. doi:  
366 10.1371/journal.pone.0180630.
- 367 7. **Fireman B, Black SB, Shinefield HR, Lee J, Lewis E, Ray P.** Impact of the pneumococcal  
368 conjugate vaccine on otitis media. *Pediatr. Infect. Dis. J.* 2003;**22**:10-16. doi: 10.1097/00006454-  
369 200301000-00006.
- 370 8. **Jokinen J, Palmu AA, Kilpi T.** Acute otitis media replacement and recurrence in the Finnish otitis  
371 media vaccine trial. *Clin. Infect. Dis.* 2012;**55**:1673-1676. doi: 10.1093/cid/cis799.
- 372 9. **Karppinen S, Toivonen L, Schuez-Havupalo L, et al.** Effectiveness of the ten-valent  
373 pneumococcal Haemophilus influenzae protein D conjugate vaccine (PHiD-CV10) against all  
374 respiratory tract infections in children under two years of age. *Vaccine*. 2019;**37**:2935-2941. doi:  
375 S0264-410X(19)30477-3.
- 376 10. **Vesikari T, Forsten A, Seppa I, et al.** Effectiveness of the 10-valent Pneumococcal Nontypeable  
377 Haemophilus influenzae protein D-conjugated vaccine (PHiD-CV) against carriage and acute otitis  
378 media-A double-blind randomized clinical trial in Finland. *J. Pediatric Infect. Dis. Soc.* 2016;**5**:237-  
379 248. doi: 10.1093/jpids/piw010.
- 380 11. **Heikkinen T, Block SL, Toback SL, Wu X, Ambrose CS.** Effectiveness of intranasal live  
381 attenuated influenza vaccine against all-cause acute otitis media in children. *Pediatr. Infect. Dis. J.*  
382 2013;**32**:669-674. doi: 10.1097/INF.0b013e3182840fe7.

- 383 12. **Norhayati MN, Ho JJ, Azman MY.** Influenza vaccines for preventing acute otitis media in infants  
384 and children. *Cochrane Database Syst. Rev.* 2017;**10**:CD010089. doi:  
385 10.1002/14651858.CD010089.pub3.
- 386 13. **Uhari M, Kontiokari T, Koskela M, Niemela M.** Xylitol chewing gum in prevention of acute  
387 otitis media: double blind randomised trial. *BMJ.* 1996;**313**:1180-1184.
- 388 14. **Uhari M, Kontiokari T, Niemela M.** A novel use of xylitol sugar in preventing acute otitis media.  
389 *Pediatrics.* 1998;**102**:879-884.
- 390 15. **Tapiainen T, Luotonen L, Kontiokari T, Renko M, Uhari M.** Xylitol administered only during  
391 respiratory infections failed to prevent acute otitis media. *Pediatrics.* 2002;**109**:E19.
- 392 16. **Hautalahti O, Renko M, Tapiainen T, Kontiokari T, Pokka T, Uhari M.** Failure of xylitol  
393 given three times a day for preventing acute otitis media. *Pediatr. Infect. Dis. J.* 2007;**26**:423-427. doi:  
394 10.1097/01.inf.0000259956.21859.dd.
- 395 17. **Hatakka K, Savilahti E, Ponka A, et al.** Effect of long term consumption of probiotic milk on  
396 infections in children attending day care centres: double blind, randomised trial. *BMJ.* 2001;**322**:1327.
- 397 18. **Lehtoranta L, Pitkaranta A, Korpela R.** Probiotics in respiratory virus infections. *Eur. J. Clin.*  
398 *Microbiol. Infect. Dis.* 2014;**33**:1289-1302. doi: 10.1007/s10096-014-2086-y.
- 399 19. **Igartua C, Davenport ER, Gilad Y, Nicolae DL, Pinto J, Ober C.** Host genetic variation in  
400 mucosal immunity pathways influences the upper airway microbiome. *Microbiome.* 2017;**5**:16-016-  
401 0227-5. doi: 10.1186/s40168-016-0227-5.
- 402 20. **Kumpu M, Kekkonen RA, Kautiainen H, et al.** Milk containing probiotic *Lactobacillus*  
403 *rhamnosus* GG and respiratory illness in children: a randomized, double-blind, placebo-controlled trial.  
404 *Eur. J. Clin. Nutr.* 2012;**66**:1020-1023. doi: 10.1038/ejcn.2012.62.
- 405 21. **Tapiovaara L, Lehtoranta L, Swanljung E, et al.** *Lactobacillus rhamnosus* GG in the middle ear  
406 after randomized, double-blind, placebo-controlled oral administration. *Int. J. Pediatr.*  
407 *Otorhinolaryngol.* 2014;**78**:1637-1641. doi: 10.1016/j.ijporl.2014.07.011.
- 408 22. **Bill NJ, Washington JA.** Bacterial interference by *Streptococcus salivarius*. *Am. J. Clin. Pathol.*  
409 1975;**64**:116-120.
- 410 23. **Brook I.** The role of bacterial interference in otitis, sinusitis and tonsillitis. *Otolaryngol. Head.*  
411 *Neck. Surg.* 2005;**133**:139-146. doi: S0194599805002573.
- 412 24. **Tano K, Hellstrom S.** Bacterial adherence to pharyngeal cells: in vitro studies with alpha-  
413 haemolytic streptococci and *Haemophilus influenzae*. *Acta Otolaryngol.* 2002;**122**:745-751.

- 414 25. **Roos K, Hakansson EG, Holm S.** Effect of recolonisation with “interfering” alpha streptococci on  
415 recurrences of acute and secretory otitis media in children: randomised placebo controlled trial. *BMJ.*  
416 2001;**322**:210-212.
- 417 26. **Burton J, Cowley S, Simon R, McKinney J, Wescombe P, Tagg J.** Evaluation of safety and  
418 human tolerance of the oral probiotic *Streptococcus salivarius*: a randomized, placebo-controlled,  
419 double-blind study. *Food Chem. Toxicol.* 2011;**49**:2356-2346.
- 420 27. **Burton J, Drummond B, Chilcott C, et al.** Influence of the probiotic *Streptococcus*  
421 *salivarius* strain M18 on indices of dental health in children: a randomized double-blind, placebo-  
422 controlled trial. *J. Med. Microbiol.* 2013;**62**:875-884.
- 423 28. **Marchisio P, Santagati M, Scillato M, Baggi E, Fattizzo M, Rosazza C.** Streptococcus salivarius  
424 24SMB administered by nasal spray for the prevention of acute otitis media in otitis-prone children.  
425 *Eur. J. Clin. Microbiol. Infect. Dis.* 2015;**34**:2377-2383.
- 426 29. **Zupancic K, Kriksic V, Kovacevic I, Kovacecic D.** Influence of oral probiotic *Streptococcus*  
427 *salivarius* K12 on ear and oral cavity health in humans: A systematic review. *Probiotics Antimicrob.*  
428 2017. Prot. doi: 10.1007/s12602-017-9261-2. [Epub ahead of print]:
- 429 30. **Horz H, Meinelt A, Houben B, Conrads G.** Distribution and persistence of probiotic  
430 *Streptococcus salivarius* K12 in the human oral cavity as determined by real-time quantitative  
431 polymerase chain reaction. *Oral Microbiol. Immunol.* 2007;**22**:126-130. doi: 10.1111/j.1399-  
432 302X.2007.00334.x.
- 433 31. **Levesque C, Lamothe J, Frenette M.** Coaggregation of *Streptococcus salivarius* with  
434 periodontopathogens: evidence for involvement of fimbriae in the interaction with *Prevotella*  
435 *intermedia*. *Oral Microbiol. Immunol.* 2003;**18**:333-337. doi: 10.1034/j.1399-302x.2003.00085.x
- 436 32. **Power DA, Burton JP, Chilcott CN, Dawes PJ, Tagg JR.** Preliminary investigations of the  
437 colonisation of upper respiratory tract tissues of infants using a paediatric formulation of the oral  
438 probiotic *Streptococcus salivarius* K12. *Eur. J. Clin. Microbiol. Infect. Dis.* 2008;**27**:1261-1263. doi:  
439 10.1007/s10096-008-0569-4.
- 440 33. **Wescombe PA, Upton M, Dierksen KP, et al.** Production of the lantibiotic salivaricin A and its  
441 variants by oral streptococci and use of a specific induction assay to detect their presence in human  
442 saliva. *Appl. Environ. Microbiol.* 2006;**72**:1459-1466. doi: 72/2/1459.
- 443 34. **Di Pierro F, Colombo M, Zanvit A, Risso P, Rottoli AS.** Use of *Streptococcus salivarius* K12 in  
444 the prevention of streptococcal and viral pharyngotonsillitis in children. *Drug Healthc. Patient Saf.*  
445 2014;**6**:15-20. doi: 10.2147/DHPS.S59665.
- 446 35. **Di Pierro F, Colombo M, Giuliani MG, et al.** Effect of administration of *Streptococcus salivarius*  
447 K12 on the occurrence of streptococcal pharyngo-tonsillitis, scarlet fever and acute otitis media in 3  
448 years old children. *Eur. Rev. Med. Pharmacol. Sci.* 2016;**20**:4601-4606. doi: 11696.

- 449 36. **Gregori G, Righi O, Risso P, Boiardi G, Demuru G, Ferzetti A.** Reduction of group A beta-  
450 hemolytic streptococcus pharyngo-tonsillar infections associated with use of the oral probiotic  
451 *Streptococcus salivarius* K12: a retrospective observational study. *Ther. Clin. Risk. Manage.*  
452 2016;**12**:87-92.
- 453 37. **Doyle H, Pierse N, Tiatia R, Williamson D, Baker M, Crane J.** Effect of oral probiotic  
454 *Streptococcus salivarius* K12 on Group A *Streptococcus* pharyngitis: a pragmatic trial in schools.  
455 *Pediatr. Infect. Dis. J.* 2018;**37**:619-623. doi: 10.1097/INF.0000000000001847.
- 456 38. **Toivonen L.** Rhinovirus infections in young children: clinical manifestations, susceptibility, and  
457 host response. PhD thesis, University of Turku, Turku; 2016.
- 458 39. **Working group set up by the Finnish Medical Society Duodecim, the Finnish Association of**  
459 **Otorhinolaryngology and Head and Neck Surgery, the Finnish Paediatric Society, the Finnish**  
460 **Association for General Practice.** 6.9.2017. Acute otitis media. *Current Care Guidelines.* **23.3.2020.**
- 461 40. **Vaz LE, Kleinman KP, Raebel MA, et al.** Recent trends in outpatient antibiotic use in children.  
462 *Pediatrics.* 2014;**133**:375-385. doi: 10.1542/peds.2013-2903.
- 463 41. **Arason VA, Kristinsson KG, Sigurdsson JA, Stefansdottir G, Molstad S, Gudmundsson S.** Do  
464 antimicrobials increase the carriage rate of penicillin resistant pneumococci in children? Cross sectional  
465 prevalence study. *BMJ.* 1996;**313**:387-391. doi: 10.1136/bmj.313.7054.387.
- 466 42. **Costelloe C, Metcalfe C, Lovering A, Mant D, Hay AD.** Effect of antibiotic prescribing in  
467 primary care on antimicrobial resistance in individual patients: systematic review and meta-analysis.  
468 *BMJ.* 2010;**340**:c2096. doi: 10.1136/bmj.c2096.
- 469 43. **Saari A, Virta LJ, Sankilampi U, Dunkel L, Saxen H.** Antibiotic exposure in infancy and risk of  
470 being overweight in the first 24 months of life. *Pediatrics.* 2015;**135**:617-626. doi: 10.1542/peds.2014-  
471 3407.
- 472 44. **Arvonen M, Virta LJ, Pokka T, Kroger L, Vahasalo P.** Repeated exposure to antibiotics in  
473 infancy: a predisposing factor for juvenile idiopathic arthritis or a sign of this group's greater  
474 susceptibility to infections? *J. Rheumatol.* 2015;**42**:521-526. doi: 10.3899/jrheum.140348.
- 475 45. **Virta L, Auvinen A, Helenius H, Huovinen P, Kolho KL.** Association of repeated exposure to  
476 antibiotics with the development of pediatric Crohn's disease--a nationwide, register-based Finnish  
477 case-control study. *Am. J. Epidemiol.* 2012;**175**:775-784. doi: 10.1093/aje/kwr400.
- 478 46. **Ortqvist AK, Lundholm C, Kieler H, et al.** Antibiotics in fetal and early life and subsequent  
479 childhood asthma: nationwide population based study with sibling analysis. *BMJ.* 2014;**349**:g6979.  
480 doi: 10.1136/bmj.g6979.
- 481 47. **Korpela K, Salonen A, Virta LJ, et al.** Intestinal microbiome is related to lifetime antibiotic use  
482 in Finnish pre-school children. *Nat. Commun.* 2016;**7**:10410. doi: 10.1038/ncomms10410.

- 483 48. **Hall MJ, Schwartzman A, Zhang J, Liu X.** Ambulatory surgery data from hospitals and  
484 ambulatory surgery centers: United States, 2010. *Natl. Health. Stat. Report.* 2017;(102):1-15.
- 485 49. **MRC Multi-Centre Otitis Media Study Group.** Air-conduction estimated from tympanometry  
486 (ACET) 1: relationship to measured hearing in OME. *Int. J. Pediatr. Otorhinolaryngol.* 2009;73:21-42.  
487 doi: 10.1016/j.ijporl.2008.09.014.
- 488 50. **Tapiainen T, Kujala T, Renko M, Koivunen P, Kontiokari T, Kristo A.** Effect of antimicrobial  
489 treatment of acute otitis media on the daily disappearance of middle ear effusion: a placebo-controlled  
490 trial. *JAMA Pediatr.* 2014;168:635-614.
- 491 51. **Roberts JE, Rosenfeld RM, Zeisel SA.** Otitis media and speech and language: a meta-analysis of  
492 prospective studies. *Pediatrics.* 2004;113:e238-48. doi: 10.1542/peds.113.3.e238.

493

494

495 **AMENDMENTS**

496

- 497 • The Ethical Committee of Oulu University Hospital reviewed the study protocol prior to the
- 498 study on 20.4.2020 with diary decision number EETTMK 36/2020.
- 499 • The Finnish Medical Agency (FIMEA) reviewed the study prior to the study with Eudra-CT
- 500 number 2020-001076-14.

501

502 **Addition 28.5.2020**

- 503 • The proportion of children with hospitalization due to acute respiratory illness in 0–6
- 504 months and duration of hospitalization

505 **Amendment 8.9.2020.** Due to the COVID-19 pandemic and restrictions in the day-care centers, the ear  
506 status of children will not be examined. Local child health clinics share study information pamphlets  
507 with the parents. AOM infections during the last 6 months will be inquired about via the electronic  
508 background data sheet. Filled-out informed consent forms will be gathered from day-care centers or via  
509 mail. Study physicians will deliver the study products either to day-care centers or personally. Parents  
510 are able to contact the study physicians any time via email, call, text message, or weekly open Zoom  
511 meetings.

512

513 **Addition 8.9.2020.** Due to the COVID-19 pandemic and restrictions at the day-care centers, the ear status of  
514 children will not be examined. MEE has been removed from the exclusion criteria.

515

516 **Addition 30.9.2020.** The electronic AOM diagnostic helper with 8 ear status pictures, including  
517 purulent AOM, will be sent to parents. If AOM is diagnosed, the parents will present the pictures to the  
518 attending doctor. The doctor will add the pictures that best represent the ear status to the patient  
519 records.

- 520 ○ The electronic diary includes 8 different pictures of healthy tympanum, bulging and
- 521 infected tympanum, and tympanum with chronic otitis media effusion. If AOM is

522 diagnosed, parents will present the pictures to the attending doctor, who will add the  
523 most presentative pictures to the patient records.

524

525 **Amendment 30.10.2020.** Due to small attendance, we expanded the recruitment area to municipal or  
526 local private day-care centers Muhos, Liminka, and Muhos and Kempele in the Oulu region, Finland.

527

528 **Addition 30.10.2020**

- 529 • Sachets are also suitable for children >3 years of age.

530

531 **Addition 30.10.2020** We added the following outcome variables to the research protocol:

- 532 • Proportion of children with a respiratory viral sample (i.e., respiratory symptoms in 0–6  
533 months)
- 534 • Proportion of children with COVID-19 infection or positive SARS-CoV-2 sample in 0–6  
535 months
- 536 • Proportion of children with throat swab
- 537 • Proportion of children with *Streptococcus pyogenes* infection or positive StrepA culture in  
538 0–6 months
- 539 • Proportion of children with other bacterial findings or viral findings in 0–6 months

540

541 **Addition 30.10.2020:** *Due to the COVID-19 pandemic*, the occurrence of AOM is likely to decrease  
542 due to large-scale hygiene interventions in society. We assume that the proportion of children with at  
543 least one AOM will decrease from 30% to 12% (60% relative decrease). With this new baseline  
544 occurrence, we regard 50% relative decrease as clinically significant (**12% to 6%**), with 80% power  
545 and a 5% alpha error. The required novel sample size is 356 per group (uncorrected chi-square) and  
546 389 per group (corrected chi-square), in total 778 children. As the primary outcome will be available  
547 for all children from the comprehensive national registry, we assume a small dropout rate of 3%. Thus,  
548 we will recruit **at least 801** children.

549

550 **Addition 17.12.21** We added the following outcomes to the research protocol:

- 551 • Proportion of children with at least one respiratory tract infection episode in 0–6 months
- 552 • Proportion of children who had undergone COVID-19 testing in 0–6 months
- 553 • The number of any AOM episode per child (including parent-reported AOM episodes  
554 without antibiotic prescriptions) in 0–6 months
- 555 • Proportion of children with  $\geq 1$  acute respiratory tract infection episode in 0–6 months
- 556 • Number of acute respiratory tract symptom days per child in 0–6 months
- 557 • The proportion of children with hospitalization due to acute respiratory illness in 0–6  
558 months and duration of hospitalization for any acute reason
- 559 • Proportion of children with  $\geq 1$  parent-reported wheezing episode in 0–6 months
- 560 • Incidence of acute AOM episodes measured as verified and purchased antibiotic  
561 prescriptions in 0–6 months
- 562 • Incidence of acute AOM episodes measured as parent-reported episodes or AOM episodes  
563 that passed with watchful waiting and verified antibiotic prescriptions in 0–6 months

564

565 We removed the following secondary outcomes:

566

- 567 • Proportion of children with a respiratory viral sample (i.e., respiratory symptoms in 0–6  
568 months)
- 569 • Proportion of children with throat swab
- 570 • Proportion of children with *Streptococcus pyogenes* infection or positive StrepA culture in  
571 0–6 months
- 572 • Proportion of children with other bacterial findings or viral findings in 0–6 months

573

574

575

576
