# Supplementary material for: Streptococcus salivarius Probiotics to Prevent Acute Otitis Media in Children: A Randomized Clinical Trial
Source: PubMed Central journal article supplement (PMC10623191; doi:10.1001/jamanetworkopen.2023.40608), 2023-11-02
Supplement: jamanetwopen-e2340608-s002.pdf [file jamanetwopen-e2340608-s002.pdf]

## Data Sharing Statement

Sarlin. Streptococcus salivarius Probiotics to Prevent Acute Otitis Media in Children. *JAMA Netw Open*. Published November 02, 2023. doi:10.1001/jamanetworkopen.2023.40608

### Data

**Data available:** Yes

**Data types:** Deidentified participant data

**How to access data:** After a reasonable request for clinical research from the principal investigator, [terhi.tapiainen@oulu.fi](mailto:terhi.tapiainen@oulu.fi)

**When available:** With publication

### Supporting Documents

**Document types:** None

### Additional Information

**Who can access the data:** After a reasonable request for clinical research from the principal investigator, [terhi.tapiainen@oulu.fi](mailto:terhi.tapiainen@oulu.fi)

**Types of analyses:** For clinical research.

**Mechanisms of data availability:** After a reasonable request for clinical research from the principal investigator, [terhi.tapiainen@oulu.fi](mailto:terhi.tapiainen@oulu.fi)
